# Supplementary material
Source: PubMed Central journal article supplement (PMC6697364)
Supplement: mmc2.pdf [file mmc2.pdf]

# Detecting and Controlling Dye Effects in Single-Virus Fusion Experiments

Robert J. Rawle,<sup>1</sup> Ana M. Villamil Giraldo,<sup>2</sup> Steven G. Boxer,<sup>3</sup> and Peter M. Kasson<sup>1,2,\*</sup>

<sup>1</sup>Departments of Molecular Physiology and Biological Physics and of Biomedical Engineering, University of Virginia, Charlottesville, Virginia; <sup>2</sup>Science for Life Laboratory, Department of Cell and Molecular Biology, Uppsala University, Uppsala, Sweden; and <sup>3</sup>Department of Chemistry, Stanford University, Stanford, California

**ABSTRACT** Fluorescent dye-dequenching assays provide a powerful and versatile means to monitor membrane fusion events. They have been used in bulk assays, for measuring single events in live cells, and for detailed analysis of fusion kinetics for liposomal, viral, and cellular fusion processes; however, the dyes used also have the potential to perturb membrane fusion. Here, using single-virus measurements of influenza membrane fusion, we show that fluorescent membrane probes can alter both the efficiency and the kinetics of lipid mixing in a dye- and illumination-dependent manner. R18, a dye that is commonly used to monitor lipid mixing between membranes, is particularly prone to these effects, whereas Texas Red is somewhat less sensitive. R18 further undergoes photoconjugation to viral proteins in an illumination-dependent manner that correlates with its inactivation of viral fusion. These results demonstrate how fluorescent probes can perturb measurements of biological activity and provide both data and a method for determining minimally perturbative measurement conditions.

**SIGNIFICANCE** Fluorescent dyes are powerful tools for labeling membranes and tracking subcellular objects, and fluorescence dequenching has further been used as a sensitive assay for membrane fusion. Here, we show how incorporation of membrane dyes can perturb membrane fusion by influenza virus in a light-dependent manner. We provide a strategy to mitigate this by minimizing dye and light exposure. Finally, we show how in some cases, these effects can be due to covalent reaction of some dyes with viral proteins upon illumination. These phenomena may be general and should be carefully controlled for in experiments using such labels.

## INTRODUCTION

Fluorescence dequenching has a long history as a means to monitor membrane changes in a variety of biological systems (1–7), but its use has not been without complications. There is a well-documented history of fluorescent probes either not partitioning strongly into the desired “compartment” or exchanging prematurely (8,9). In early studies of synaptic neurotransmission, there were reports of thermally induced membrane fusion that was ascribed to local heating at high illumination intensity (10). In our prior work, we observed that fusion behavior was more robust with some fluorescent probes than others, and some dyes have been

reported by others to perturb lipid-mixing kinetics at high concentrations (3–5 mol%) (3). Both water-soluble and membrane-associated dyes can each perturb fusion; here, we examine specifically the effects of membrane-associated dyes that are commonly used to monitor viral membrane fusion. We present a systematic study that compares the effects on influenza virus fusion using two fluorescent probes, R18 and Texas Red, widely used to monitor lipid mixing between a labeled viral particle and a target membrane. Although many other fluorescence-dequenching probes exist, these two were chosen as ones that can readily be introduced into viral membranes at self-quenching concentrations and have previously been reported in single-virus fusion measurements of multiple enveloped viruses (11–14).

The fundamental observation motivating this study is our observation that high illumination intensity can suppress viral fusion yields, as measured by lipid mixing, and such suppression presumably also suppresses downstream stages of fusion. We show that this is dose-dependent in both light

Submitted May 22, 2019, and accepted for publication June 25, 2019.

\*Correspondence: [kasson@virginia.edu](mailto:kasson@virginia.edu)

Robert J. Rawle's present address is Department of Chemistry, Williams College, Williamstown, Massachusetts.

Editor: Ilya Levental.

<https://doi.org/10.1016/j.bpj.2019.06.022>

© 2019 Biophysical Society.

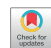

intensity and dye concentration and varies with the chemical identity of the dye used. In addition to inhibiting fusion, illumination effects can alter lipid-mixing kinetics. We hypothesize that this is due, at least in part, to photoinduced reactivity between the dye and viral components.

## MATERIALS AND METHODS

Palmitoyl-oleoyl-phosphatidylcholine (POPC), dioleoyl-phosphatidylethanolamine (DOPE), and cholesterol (ovine) were purchased from Avanti Polar Lipids (Alabaster, AL). Texas Red-1,2-dihexadecanoyl-*sn*-glycero-3-phosphoethanolamine (TR-DHPE), Oregon Green-1,2-dihexadecanoyl-*sn*-glycero-3-phosphoethanolamine (OG-DHPE), and octadecyl rhodamine B chloride (R18) were purchased from Thermo Fisher Scientific (Waltham, MA). Disialoganglioside GD1a from bovine brain (Cer-Glc-Gal(NeuAc)-GalNAc-Gal-NeuAc) was purchased from Sigma-Aldrich (St. Louis, MO). 11-Azidoundecyltrimethoxysilane was obtained from Sikemia (Clapiers, France). 1,1',1''-Tris(1H-1,2,3-triazol-4-yl-1-acetic acid ethyl ester) trimethylamine (TTMA) ligand was a generous gift from Professor Christopher Chidsey at Stanford University. Alkyne-DNA and DNA-lipids were prepared as previously described (15). Ethynyl phosphonic acid was synthesized as previously described (16). Influenza A virus strain X-31 (A/Aichi/68, H3N2) was purchased from Charles River Laboratories (Wilmington, MA).

### Buffer definitions

Reaction buffer = 10 mM NaH<sub>2</sub>PO<sub>4</sub>, 90 mM sodium citrate, 150 mM NaCl (pH 7.4). Fusion buffer = 10 mM NaH<sub>2</sub>PO<sub>4</sub>, 90 mM sodium citrate, 150 mM NaCl (pH 5.0). HB buffer = 20 mM Hepes, 150 mM NaCl (pH 7.2).

### Microscopy and illumination intensity

Fluorescence microscopy images and videos were captured using a Nikon Ti-U epi-fluorescence inverted microscope with a 100× plan apo oil immersion objective, NA = 1.49 (Nikon Instruments, Melville, NY), emission/excitation filter wheels, and an Andor iXon 897 EMCCD camera (Andor Technologies, Belfast, UK). A Spectra-X LED Light Engine (Lumencor, Beaverton, OR) was used as the excitation light source. Metamorph software (Molecular Devices, Sunnyvale, CA) was used to operate the microscope. Filter cubes and excitation/emission filters were as follows: Texas Red and R18 images = filter cube (ex = 562/40 nm, bs = 593 nm, em = 624/40 nm), with additional excitation (ex = 560/55 nm) and emission (em = 645/75 nm) filters. Oregon Green images = filter cube (ex = 475/35 nm, bs = 509 nm, em = 528/38 nm), with additional excitation (ex = 460/50 nm) and emission (em = 535/50 nm) filters. All images and video micrographs were captured at 16-bit and 288 ms/frame, with each field of view 82 × 82 μm.

Illumination intensity was measured through the microscope using a handheld optical power meter (Thorlabs, Newton, NJ) capturing all light through a 10× objective and using the Texas Red/R18 filter cube/excitation filters as above. With a 100× objective, this light is distributed across a roughly 50 μm radius circle. From this, we calculated the illumination intensity at the sample surface for the various intensity settings on the LED light engine, with 255 as the maximal intensity: intensity setting 4/255 = 2.93 W/cm<sup>2</sup>, intensity setting 6/255 = 7.64 W/cm<sup>2</sup>, intensity setting 8/255 = 12.7 W/cm<sup>2</sup>, intensity setting 10/255 = 17.8 W/cm<sup>2</sup>. Prior reports used illumination intensities of 350 W/cm<sup>2</sup> at 488 nm and 70 W/cm<sup>2</sup> at 568 nm (17) and ~22–28 W/cm<sup>2</sup> at 532 nm (12).

### Fluorescent labeling of influenza virus membrane

Lipid dye solutions were prepared by mixing either TR-DHPE (0.75 mg/mL in ethanol) or R18 (1.5 mg/mL in ethanol) with HB buffer

at the appropriate concentration. A small volume of virus suspension (typically 6 μL) at 2 mg total protein/mL was mixed with 4× volume (typically 24 μL) of dye/HB buffer mixture to yield the final concentration as listed in the data. The solution was incubated for 2 h at room temperature on a rocker. Labeled virus was purified from unincorporated dye by adding 1.3 mL HB buffer and centrifuging for 50 min at 21,000 × *g*. The pellet containing labeled virus was resuspended in 30 μL of HB buffer and allowed to rest on ice at 4°C for at least several hours. For lipid-mixing assays, labeled virus was stored on ice at 4°C and was used within several days of labeling.

### Estimation of mean dyes per virion

The mean number of dye molecules per virion was estimated by dividing the measured concentration of fluorescent dye in a sample of labeled virus by the estimated concentration of viral particles.

To estimate the mean concentration of fluorescent dyes incorporated into the viral particles, a small volume of labeled virus was solubilized with 10% Triton-X in HB buffer to yield a final Triton-X concentration of 1%. The solubilized virus was diluted in HB buffer with 1% Triton-X, and the fluorescence emission spectrum of the sample was measured using a fluorimeter (Perkin Elmer LS 55; Waltham, MA). The integrated fluorescence intensity across the spectrum was calculated and compared to a standard curve of known dye concentration in the same buffer to determine the concentration of fluorescent dye in the viral suspension. Slit widths, excitation wavelengths, and integration windows were optimized for each dye to yield a reasonable signal without saturating the detector. The same settings were then used for all measurements of a given dye. This method approximates the quenching behavior of the dye in the viral membrane, where the effective distribution volume is the membrane volume, as similar to the equivalent concentration of Triton-solubilized dye in solution, using the full solution volume as the distribution volume; deviation from this will contribute to the error of estimation.

Separately, the concentration of virus was estimated as we have reported previously (15) by measuring the viral protein concentration using a bicinchoninic acid (BCA) protein concentration assay kit (Thermo Fisher Scientific) and then dividing the measured protein concentration by the average total protein molecular weight per viral particle ( $1.8 \times 10^8$  Da) calculated from literature values of average copy numbers of viral proteins per virion (18). Mean protein concentration measurements were made on mock-labeled virus samples because the Texas Red and R18 dyes have overlapping absorbance spectra with the BCA-Cu(I) complex used in the BCA assay.

### Single-virus lipid-mixing assay

Single-virus lipid-mixing measurements were performed inside microfluidic flow cells as previously described (15). Briefly, glass coverslips were functionalized with 11-azidoundecyltrimethoxysilane via vapor deposition. Microfluidic flow cells (2.5 mm × 13 mm × 70 μm) made of polydimethyl siloxane were then affixed to the functionalized coverslips using epoxy. Subsequently, short DNA oligomers (DNA sequence 5'-alkyne-TCCTGTGTGAAATTGTTATCCGCA-3') were then attached to the functionalized coverslip surface inside the flow cell via copper catalyzed azide-alkyne click chemistry using TTMA ligand, and the remaining surface was passivated using ethynyl phosphonic acid.

Separately, lipid mixtures containing 67.5 mol% POPC, 20% DOPE, 10% cholesterol, 2% GD1a, and 0.5% OG-DHPE were prepared in chloroform, evaporated to a lipid film under N<sub>2</sub> gas and house vacuum, resuspended in reaction buffer, and then extruded into liposomes using a polycarbonate membrane with 100 nm pore size. DNA lipids (DNA sequence 5'-lipid-TGCGGATAACAATTTACACAGGA-3') were incorporated into the outer membrane leaflet of the liposomes at 0.01 mol% by overnight incubation at 4°C. These liposomes displaying DNA were

introduced into the microfluidic flow cells. Hybridization between DNA anchored in the liposomes and DNA attached to the functionalized coverslip resulted in DNA-tethered liposomes on the coverslip surface. These tethered liposomes were the target membranes for the lipid assays. Any unbound liposomes were removed by extensive rinsing.

After preparation of the microfluidic flow cell with target membranes, fluorescently labeled virus was added and incubated with the target membranes for several minutes to allow viral binding. The flow cell was then extensively rinsed with reaction buffer to remove any unbound virions. Any images taken to find and focus on a suitable area of the sample during this period were always taken at intensity setting 4/255 on the LED light engine (2.93 W/cm<sup>2</sup>). The buffer in the flow cell was then exchanged with pH 5.0 fusion buffer to trigger viral fusion, which was monitored by fluorescence video microscopy at the indicated illumination intensity for 5 min. Lipid-mixing events between the viral and target membranes were detected by fluorescence dequenching of the dye-labeled lipid.

### Measurement of lipid mixing in unilluminated areas

To observe lipid mixing in unilluminated areas, microfluidic flow cells with target membranes and bound virus were prepared as above. Before introduction of the pH 5.0 fusion buffer, images of bound virus in several areas within the flow cell were taken. Viral fusion was then triggered by introduction of the low pH buffer, during which time none of the areas were illuminated. After approximately 5 min, images of the same areas were again taken. All images were acquired using intensity setting 4/255 on the LED light engine (2.93 W/cm<sup>2</sup>). Lipid-mixing events between the viral and target membranes in those areas were also assessed by fluorescence dequenching, as described in the analysis section below. Note that often the same flow cell was used to collect both the data for illuminated and unilluminated areas. In this case, the unilluminated areas were located far away (at least several hundreds of microns) from the illuminated areas to minimize any influence of scattered light on the unilluminated regions during collection of the fusion video.

### Measurement of dye photoadducts

5  $\mu$ L of labeled virus were applied to an empty microfluidic well on a glass coverslip, illuminated for 1 min at intensity 38/255, and then extracted. Samples were resuspended in 15  $\mu$ L of loading buffer (50 mM Tris (pH 6.8), 2% SDS, 100 mM dithiothreitol, 10% glycerol, and 0.5% bromophenol blue) and loaded without heating on a 4–12% acrylamide NuPAGE gel (Invitrogen, Carlsbad, CA). Proteins were separated through electrophoresis in 50 mM MES, 50 mM Tris base, 0.1% SDS, 1 mM EDTA (pH 7.3). Fluorescence imaging of the gel (excitation 520–545 nm, emission 577–613 nm) was performed before staining the gel with Coomassie blue and imaging overall protein content using a ChemiDoc MP instrument (Bio-Rad, Hercules, CA).

### Analysis of microscopy data

Custom-built MATLAB (The Mathworks, Natick, MA) programs described previously (15) and available at <https://github.com/kassonlab/micrograph-spot-analysis> were used to automatically extract fluorescence intensity time traces from individual viral particles in the standard lipid-mixing assay and to analyze those traces to determine the waiting time between pH drop and the onset of lipid mixing.

To estimate the lipid-mixing efficiency for the unilluminated data sets, we modified our prior MATLAB code to calculate the percentage difference in background subtracted fluorescence intensity per particle in the before and after pH drop images. To determine the appropriate threshold value for the percentage intensity difference that would be categorized as lipid mixing, a control data set was used in which the pH was not dropped but

all experimental details remained the same otherwise. The false positive error in the control data sets were 2% or less.

### Kinetic modeling

Two kinetic models were fitted to the single-virus fusion data to test the hypothesis that a dye-driven and light-driven inactivation process could explain the change in fusion efficiencies and rates. Inactivation was assumed to be linear in [dye]  $\times$  light intensity. Details of the two models follow.

A chemical kinetics model formalism previously developed for Zika membrane fusion (14) was modified to incorporate three sequential steps from membrane-bound virus to hemifusion in accordance with the single-virus kinetic model used by Floyd and colleagues (11). The resulting formalism had the following kinetic parameters:

$$B \xrightarrow{I} I,$$

$$B \xrightarrow{A1} A2 \xrightarrow{HF} HF.$$

In the best-fit models, the rate constant for  $A1 \rightarrow B$  was zero. These kinetic models were fitted to all the observed single-virus fusion data using previously developed code available from <https://github.com/kassonlab/zika-kinetics>.

A cellular automaton model for influenza virus fusion that tracks activation of individual hemagglutinin trimers was also fitted to the single-virus fusion data. This model was original formulated by Ivanovic and co-workers (19,20) and previously modified by us (21). Code available at <https://github.com/kassonlab/fusionmodel/> was used for nonlinear optimization of rate constants to find rates that maximize the likelihood of the observed single-virus fusion data. Joint fitting was performed across all dye concentrations and light intensities.

## RESULTS AND DISCUSSION

To test the effects of fluorescent dye and illumination intensity on influenza membrane fusion, we prepared influenza virus samples labeled with different dye concentrations (see [Materials and Methods](#)) and performed single-virus fusion experiments in microfluidic flow cells as previously reported (15). In these experiments, labeled influenza virus is bound to GD1a displayed on tethered vesicles (molar ratios 67.5 POPC/20 DOPE/10 Chol/2 GD1a/0.5 OG-DHPE), unbound virus is washed away, and then fusion is triggered by buffer exchange to pH 5.0. Lipid mixing between labeled virus and target membranes is assessed as fluorescence dequenching measured via video microscopy ([Fig. 1](#)). Single-event waiting times from pH drop to fluorescence dequenching are compiled into cumulative distribution functions, which are then used to assess both lipid-mixing kinetics and efficiency, which provides an upper bound on fusion efficiency. To assess illumination effects on fusion efficiency, we also measured the fusion efficiency within other fields of view that were illuminated only for two exposures, one before triggering fusion and one  $\sim$ 5 min after. These images were used to estimate fusion efficiency for single viral particles and compared to the fusion efficiency observed during illuminated video traces with illumination settings within the range of those reported previously.

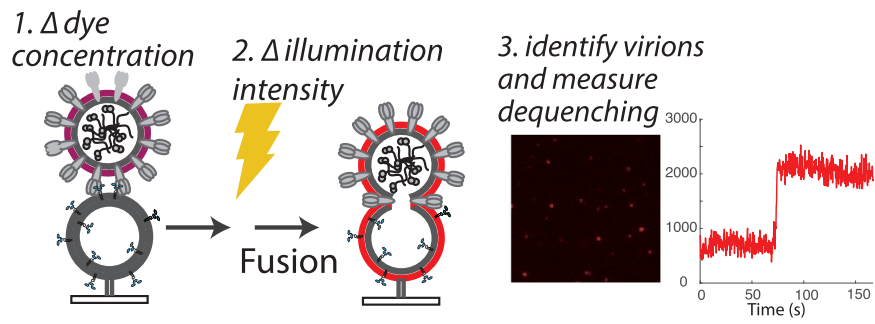

FIGURE 1 Measurement of single-virus influenza fusion at variable dye concentrations and illumination intensities. X-31 influenza virions are labeled with designated concentrations of TR-DHPE or R18 dye and then bound to GD1a-containing liposomes immobilized inside a microfluidic flow cell. Fusion is triggered by a buffer exchange to pH 5.0, and the sample is subjected to different illumination intensities for 5 min. In unilluminated samples, fusion efficiency is determined by fluorescence dequenching at 5 min relative to experiment start; in illuminated samples, lipid-mixing kinetics and efficiency are determined by following time traces of individual virions identified in the images. A sample trace for R18-labeled virus is shown. To see this figure in color, go online.

The commonly used R18 dye readily incorporates into influenza viral membranes at self-quenching concentrations (Fig. S1). At the lowest concentration of R18 dye tested and the lowest illumination level, there was no detectable difference in the efficiency of lipid mixing observed from video microscopy traces and that measured in single-time-point experiments. However, a twofold increase in either dye concentration or illumination intensity significantly decreased fusion efficiency, with a more profound

effect observed with R18 dye concentration than with illumination (Fig. 2). We also noted changes in fusion efficiency at high R18 concentration independent of illumination consistent with previous reports (3), resulting in an increase in lipid mixing at high dye concentration and no illumination that may be due to a bilayer-modifying effect of R18. We observed no analogous changes with Texas Red (see below); here, we concentrate on the illumination-dependent effects. Even at the lowest concentration of

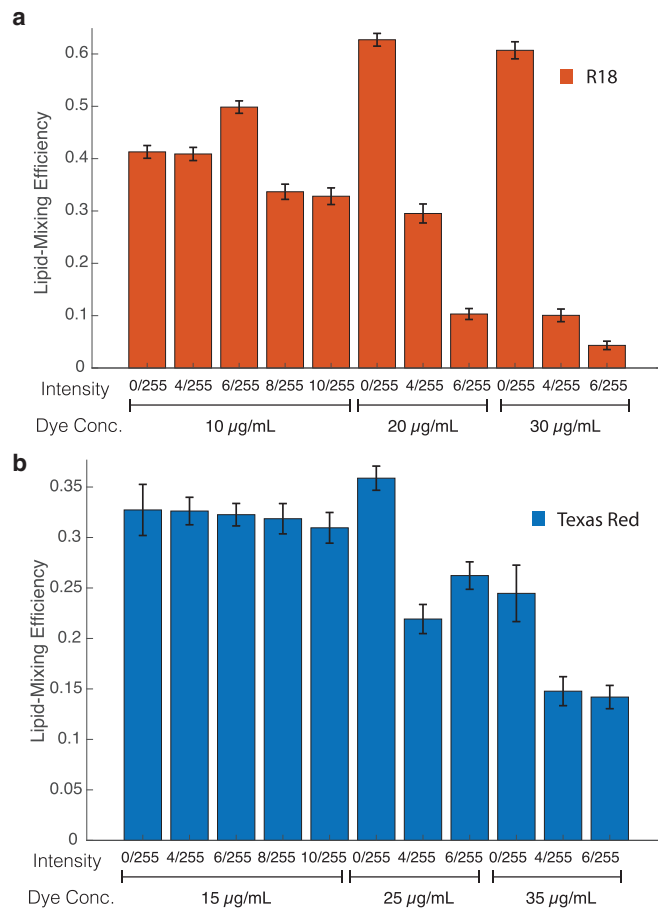

FIGURE 2 Photoinhibition of membrane fusion by influenza virus labeled with R18 or TR-DHPE dyes. Lipid-mixing efficiency is plotted for virus labeled with different concentrations of (a) R18 or (b) Texas Red dye and exposed to the indicated illumination intensities for 6 min before measurement. Photoinhibition is apparent at high dye concentrations and more marked for R18 than Texas Red. Efficiency is calculated as number of virions undergoing lipid mixing/total number of bound virions observed. Error bars are plotted as SDs across fields of view for unilluminated samples and bootstrapped SDs across individual viruses for illuminated samples. Illumination intensities are reported as fraction of maximal LED intensity. Measured intensities are given in the Materials and Methods. To see this figure in color, go online.

dye tested, increasing illumination intensity substantially increased fusion kinetics even as it decreased efficiency, with a  $\sim 2.5$ -fold variation in  $t_{1/2}$  for lipid mixing over a 2.5-fold illumination intensity range (Fig. 3). The intensity distribution of R18-labeled virions changed slightly over the illumination conditions but less than the Texas-Red-labeled virions (Fig. S2), so the decrease in fusion intensity cannot be attributed to detection of poorly labeled virions at high illumination that then fail to undergo dequenching. These results suggest that some product of dye illumination either 1) selectively inactivates slow-fusing viral subpopulations or 2) inactivates virus in a time-dependent manner, thus appearing to bias fusion events toward early time points before inactivation.

Dyes conjugated to two-tailed lipids are more difficult to load into viral particles at self-quenching concentration,

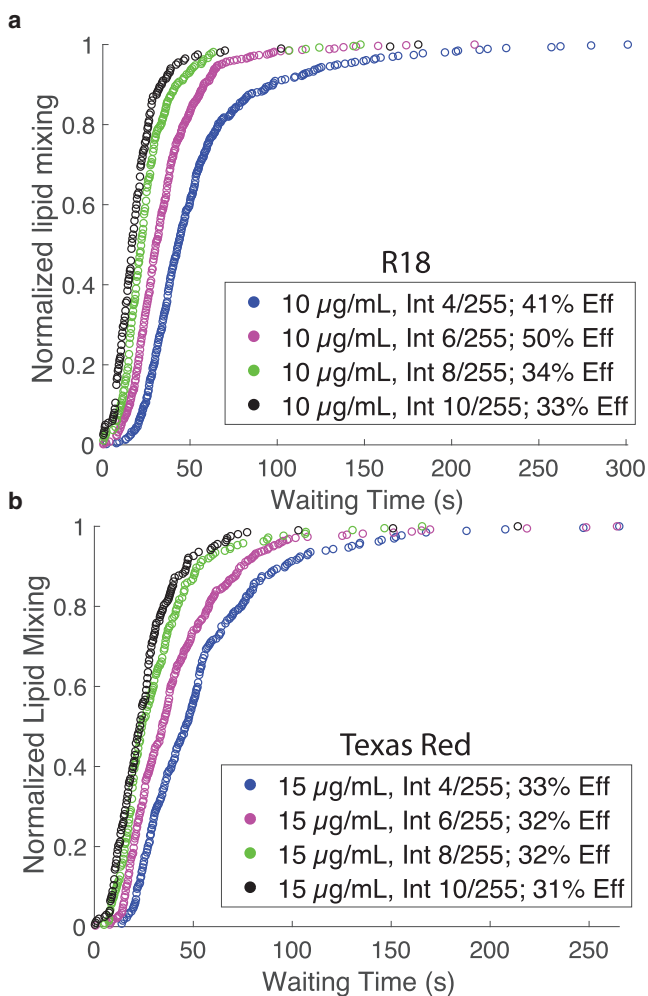

FIGURE 3 Kinetics of viral hemifusion perturbed by higher light intensity. Cumulative distribution plots for lipid mixing of individual viruses labeled with R18 (a) or Texas Red (b) are shown at different illumination intensities. Legends denote the dye concentration used for labeling, the intensity of illumination relative to the max LED output of 255, and the efficiency of lipid mixing (denoted Eff). Higher illumination leads to faster lipid-mixing kinetics. To see this figure in color, go online.

but several, including TR-DHPE, have been used as probes for membrane fusion in different viral systems (3,22–25). We have anecdotally found Texas Red more robust to photoinhibition effects (14,15), so we tested it more systematically. At the lowest concentrations tested, Texas Red was more robust to photoinhibition effects than R18, although photoinhibition was evident at higher concentrations and illumination intensities. The mean numbers of dyes per virion are listed in Table 1 for each labeling concentration used; fluorescence-dequenching ratios are given in Fig. S1. An increase in the rate of fusion kinetics was evident with increasing illumination, demonstrating that fusion can be perturbed even in the absence of photoinactivation. Here, we use photoinhibition to refer broadly to reduction of lipid mixing and subsequent fusion after a given waiting time and photoinactivation to refer more specifically to the reduction of the maximal amount of virus undergoing fusion, presumably in an irreversible fashion. We note that photoinactivation is sometimes used to refer specifically to inactivation of viral genetic material; here, we use it in a more general sense of any photoeffect that abrogates viral infectivity, whether by affecting fusion or downstream events. Cumulative distribution functions for influenza fusion using Texas Red-labeled and R18-labeled virus overlaid well at the lowest dye concentrations and illumination intensities used, and no significant photoinactivation was detected. This asymptotic behavior suggests that both of these dyes can yield accurate measures of viral membrane fusion if dye concentration and illumination intensity are tightly controlled.

To probe the chemical nature of the photoinactivation process, we hypothesized that dyes might form photoadducts with viral components. We tested this for viral proteins by adding dye to viral samples, either exposing them to light or not, and then detergent-solubilizing the samples and size-separating proteins via gel electrophoresis. As shown in Fig. 4, viral envelope or membrane-proximal proteins acquired red fluorescence after illumination in a dye-concentration-dependent manner in R18-labeled samples but not detectably in Texas Red-labeled samples. In particular, viral hemagglutinin undergoes a gel shift upon R18 labeling and illumination but not upon Texas Red labeling and

TABLE 1 Labeling Efficiency of Influenza Virus with R18 or Texas Red

| R18 Labeling Solution      | R18 Mean Dyes per Virion | Texas Red Labeling Solution | Texas Red Mean Dyes per Virion |
|----------------------------|--------------------------|-----------------------------|--------------------------------|
| 10 $\mu\text{g}/\text{mL}$ | 1900                     | 15 $\mu\text{g}/\text{mL}$  | 940                            |
| 20 $\mu\text{g}/\text{mL}$ | 5100                     | 25 $\mu\text{g}/\text{mL}$  | 5500                           |
| 30 $\mu\text{g}/\text{mL}$ | 6800                     | 35 $\mu\text{g}/\text{mL}$  | 8000                           |
| 40 $\mu\text{g}/\text{mL}$ | 7100                     | –                           | –                              |

At low dye concentrations, there is a supralinear increase in labeling with dye concentration; this becomes linear in the 20–35  $\mu\text{g}/\text{mL}$  region for both dyes and begins to saturate at 40  $\mu\text{g}/\text{mL}$  for R18.

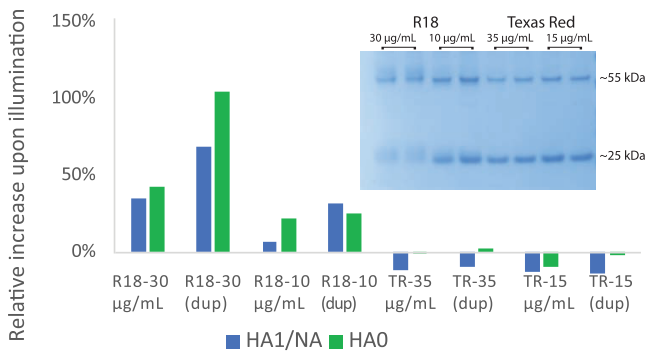

**FIGURE 4** R18 forms photoadducts with influenza proteins upon illumination. SDS-PAGE of dye-labeled influenza virus with and without illumination yielded fluorescent protein bands. Fluorescence intensities of the bands corresponding to the HA0 monomer and either the HA1 subunit or neuraminidase ( $\sim 75$  and  $\sim 55$  kDa, respectively) were calculated; these were normalized by the Coomassie blue staining intensity of each band, and then the % increase in fluorescence was calculated between unilluminated and illuminated samples. Samples are denoted by the dye (R18 or Texas Red) and concentration ( $\mu\text{g}/\text{mL}$ ) used to label the virus; “dup” denotes duplicate samples. The use of R18 as a lipid marker caused a substantial increase in protein fluorescence in a dye-concentration-dependent manner, whereas Texas Red-DHPE did not when similarly introduced into the viral membrane. A gel shift for the 55 kDa band and also the 25 kDa band where the HA2 and M1 bands comigrate (28) is also evident in the Coomassie-blue-stained bands after illumination of the R18-labeled samples, as shown in the inset. Full gels are shown in Fig. S4. To see this figure in color, go online.

illumination; the fluorescence spectrum of the shifted band is shown in Fig. S3. This demonstrates a covalent adduct formed by R18 dye and a portion of the hemagglutinin. These results suggest that R18:viral protein photoadducts correlate with photoinactivation, although they do not prove that the protein adducts, as opposed to other photochemical products in the viral membrane, are causative for viral inactivation.

To test whether photoinactivation can explain the observed dye and illumination effects on fusion, we used two sets of kinetic models, one simple chemical kinetics model similar to that previously used to analyze Zika virus inactivation (14) but modified for influenza (see **Materials and Methods**) and one cellular automaton model that can explicitly treat inactivation of individual hemagglutinin trimers (19–21). As schematized in Fig. 5, the cellular automaton model describes state transitions of individual hemagglutinin trimers (“per-protein model”), whereas the chemical kinetics model is formulated to describe state transitions of whole virus particles (“per-virus model”). Fusion and inactivation parameters for each of these models were optimized to fit fusion efficiencies and waiting-time distributions (see **Materials and Methods** for details). Both models produced a decrease in fusion efficiency with increasing R18 concentration or illumination (Fig. 5), but neither could explain well the increase in fusion rates observed. Interestingly, the cellular automaton model fit the efficiency data much better over the full range of dye

concentrations and illumination intensities measured. Because in the chemical kinetics model, the whole virus inactivates as a unit, whereas in the cellular automaton model, each hemagglutinin trimer undergoes stochastic inactivation independently, the better fit of the cellular automaton model suggests that dye photoreaction with individual fusion proteins better describes the physical process of photoinactivation. These results are consistent with the following explanation: reduced fusion efficiency with increased R18 dye concentration or illumination power results from hemagglutinin inactivation due to photoconjugation. Interestingly, a previous report noted photoinactivation of Sindbis virus by R18 without inhibition of lipid mixing, in that case without detectable photoreactivity on SDS-PAGE (26). Other dyes such as methylene blue have been shown to inactivate RNA viruses, likely by altering viral genetic material (27). In our findings, the increased rates of lipid-mixing likely reflect another mechanistic process, possibly dye-mediated photoconjugation or photo-oxidation of viral lipids, or alternately, a local heating effect from dye thermal relaxation.

## CONCLUSIONS

Our data demonstrate that photoreactivity of common fluorescent dyes can inhibit viral membrane fusion and perturb apparent fusion kinetics. Careful optimization of dye labeling and illumination intensity can avoid measurable photoreactivity and perturbation, but care should be taken in designing and interpreting membrane fusion experiments to avoid results that reflect photoreactivity and photoinhibition and to make meaningful comparisons among results from different laboratories. In the case of influenza membrane fusion, R18 is particularly prone to a photoinhibition effect that can be largely explained by photoconjugation of the dye to the hemagglutinin protein. Both R18 and Texas Red perturb fusion kinetics in an illumination-dependent manner that cannot be explained by photoconjugation. These can be avoided using low dye concentrations and minimal illumination. Furthermore, such effects are thus likely to be quite general and extend beyond influenza viral fusion and even viral membrane fusion, although these systems provide sensitive readouts of dye photoreactivity. Fluorescent probes provide powerful chemical tools to measure biochemical processes, but the possibility to perturb the system of interest is always a concern, and these results provide concrete data of how viral membrane fusion can be perturbed by dye photoreactivity. These results also argue for assay systems that minimize dye levels in the virions and avoid the light-dependent processes documented here.

## SUPPORTING MATERIAL

Supporting Material can be found online at <https://doi.org/10.1016/j.bpj.2019.06.022>.

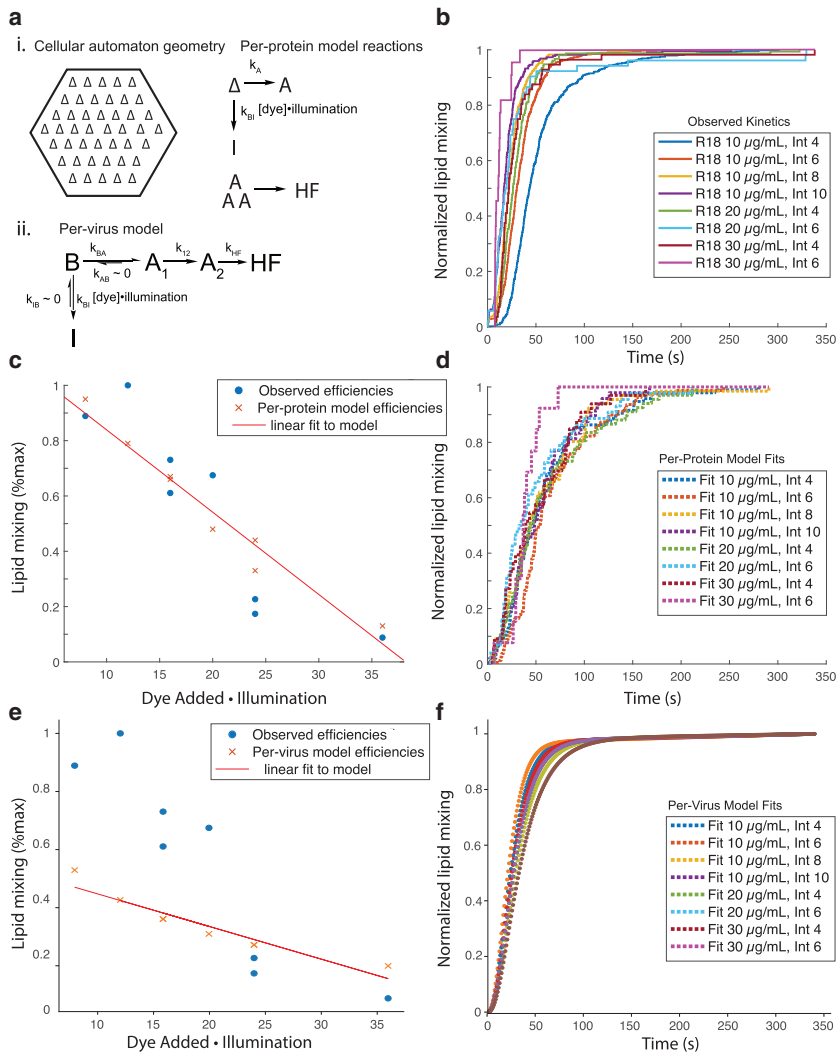

**FIGURE 5** Kinetic models of fusion protein inactivation can account for photoinactivation of fusion. Computational models of per-fusion-protein inactivation and per-virus inactivation (schematized in *a*) were fitted to single-virus fusion data at multiple R18 dye concentrations and illumination intensities (cumulative distribution functions in *b*). The models specify interconversion rates among bound (B), activated (A), inactivated (I), and hemifused (HF) states. In the per-protein model, states describe individual hemagglutinin trimers (except HF), whereas in the per-virus model, states describe the virus as a whole. The per-protein model could better account for the reduced fusion efficiency than the per-virus model (*c* and *e*) when lipid mixing was normalized across conditions. Cumulative distribution functions of modeled and observed fusion events normalized within each dye and illumination condition (*b*, *d*, and *f*) show that neither model robustly reproduces the slight speeding of fusion at increased dye illumination. Total numbers of lipid-mixing events used to construct the cumulative distribution functions were 482, 677, 294, 222, 153, 52, 56, and 22 for the eight conditions plotted. The cellular automaton used in the model represents the virus:target membrane contact zone as a hexagonal lattice with individual hemagglutinin trimers that can convert to A or I. Three neighboring activated trimers result in HF. Legends in (*b*), (*d*), and (*f*) specify dye loading concentration and intensity (out of 255). To see this figure in color, go online.

## AUTHOR CONTRIBUTIONS

R.J.R. designed experiments, performed experiments, analyzed data, and co-wrote the article. A.M.V.G. performed experiments and analyzed data. S.G.B. designed experiments and co-wrote the article. P.M.K. designed experiments, analyzed data, and co-wrote the article.

## ACKNOWLEDGMENTS

The authors thank K. Liu, K. Okamoto, A. Sengar, and E. Webster for helpful discussions.

This work was supported by a Wallenberg Academy Fellowship to P.M.K. and National Institutes of Health grants R35 GM118044 to S.G.B. and R01 GM098304 to P.M.K.

## REFERENCES

- Blumenthal, R., S. A. Gallo, ..., A. Puri. 2002. Fluorescent lipid probes in the study of viral membrane fusion. *Chem. Phys. Lipids*. 116:39–55.
- Morris, S. J., D. P. Sarkar, ..., R. Blumenthal. 1989. Kinetics of pH-dependent fusion between 3T3 fibroblasts expressing influenza hemagglutinin and red blood cells. Measurement by dequenching of fluorescence. *J. Biol. Chem.* 264:3972–3978.
- Razinkov, V. I., G. B. Melikyan, ..., F. S. Cohen. 1998. Effects of spontaneous bilayer curvature on influenza virus-mediated fusion pores. *J. Gen. Physiol.* 112:409–422.
- Schroth-Diez, B., E. Ponimaskin, ..., A. Herrmann. 1998. Fusion activity of transmembrane and cytoplasmic domain chimeras of the influenza virus glycoprotein hemagglutinin. *J. Virol.* 72:133–141.
- Blumenthal, R., A. Bali-Puri, ..., O. Eidelman. 1987. pH-dependent fusion of vesicular stomatitis virus with Vero cells. Measurement by dequenching of octadecyl rhodamine fluorescence. *J. Biol. Chem.* 262:13614–13619.
- Stegmann, T., H. W. Morselt, ..., J. Wilschut. 1987. Fusion of influenza virus in an intracellular acidic compartment measured by fluorescence dequenching. *Biochim. Biophys. Acta.* 904:165–170.
- MacDonald, R. I. 1985. Membrane fusion due to dehydration by polyethylene glycol, dextran, or sucrose. *Biochemistry.* 24:4058–4066.
- Hughes, L. D., R. J. Rawle, and S. G. Boxer. 2014. Choose your label wisely: water-soluble fluorophores often interact with lipid bilayers. *PLoS One.* 9:e87649.
- Nunes-Correia, I., A. Eulálio, ..., M. C. Pedroso de Lima. 2002. Fluorescent probes for monitoring virus fusion kinetics: comparative evaluation of reliability. *Biochim. Biophys. Acta.* 1561:65–75.

10. Bowen, M. E., K. Weninger, ..., S. Chu. 2004. Single molecule observation of liposome-bilayer fusion thermally induced by soluble N-ethyl maleimide sensitive-factor attachment protein receptors (SNAREs). *Biophys. J.* 87:3569–3584.
11. Floyd, D. L., J. R. Ragains, ..., A. M. van Oijen. 2008. Single-particle kinetics of influenza virus membrane fusion. *Proc. Natl. Acad. Sci. USA.* 105:15382–15387.
12. Wessels, L., M. W. Elting, ..., K. Weninger. 2007. Rapid membrane fusion of individual virus particles with supported lipid bilayers. *Biophys. J.* 93:526–538.
13. Schmidt, F. I., P. Kuhn, ..., P. S. Dittrich. 2013. Single-virus fusion experiments reveal proton influx into vaccinia virions and hemifusion lag times. *Biophys. J.* 105:420–431.
14. Rawle, R. J., E. R. Webster, ..., S. G. Boxer. 2018. pH dependence of Zika membrane fusion kinetics reveals an off-pathway state. *ACS Cent. Sci.* 4:1503–1510.
15. Rawle, R. J., S. G. Boxer, and P. M. Kasson. 2016. Disentangling viral membrane fusion from receptor binding using synthetic DNA-lipid conjugates. *Biophys. J.* 111:123–131.
16. Hughes, L. D. 2013. Model membrane architectures for the study of membrane proteins. PhD thesis. Stanford University.
17. Floyd, D. L., S. C. Harrison, and A. M. van Oijen. 2009. Method for measurement of viral fusion kinetics at the single particle level. *J. Vis. Exp.* (31):e1484.
18. Hutchinson, E. C., P. D. Charles, ..., E. Fodor. 2014. Conserved and host-specific features of influenza virion architecture. *Nat. Commun.* 5:4816.
19. Ivanovic, T., J. L. Choi, ..., S. C. Harrison. 2013. Influenza-virus membrane fusion by cooperative fold-back of stochastically induced hemagglutinin intermediates. *eLife.* 2:e00333.
20. Ivanovic, T., and S. C. Harrison. 2015. Distinct functional determinants of influenza hemagglutinin-mediated membrane fusion. *eLife.* 4:e11009.
21. Zawada, K. E., K. Okamoto, and P. M. Kasson. 2018. Influenza hemifusion phenotype depends on membrane context: differences in cell-cell and virus-cell fusion. *J. Mol. Biol.* 430:594–601.
22. Tse, F. W., A. Iwata, and W. Almers. 1993. Membrane flux through the pore formed by a fusogenic viral envelope protein during cell fusion. *J. Cell Biol.* 121:543–552.
23. Lakadamyali, M., M. J. Rust, ..., X. Zhuang. 2003. Visualizing infection of individual influenza viruses. *Proc. Natl. Acad. Sci. USA.* 100:9280–9285.
24. van der Schaar, H. M., M. J. Rust, ..., J. M. Smit. 2008. Dissecting the cell entry pathway of dengue virus by single-particle tracking in living cells. *PLoS Pathog.* 4:e1000244.
25. Zaitseva, E., S. T. Yang, ..., L. V. Chernomordik. 2010. Dengue virus ensures its fusion in late endosomes using compartment-specific lipids. *PLoS Pathog.* 6:e1001131.
26. Thongthai, W., and K. Weninger. 2009. Photoinactivation of sindbis virus infectivity without inhibition of membrane fusion. *Photochem. Photobiol.* 85:801–806.
27. Floyd, R. A., J. E. Schneider, Jr., and D. P. Dittmer. 2004. Methylene blue photoinactivation of RNA viruses. *Antiviral Res.* 61:141–151.
28. Harvey, R., M. Hamill, ..., O. G. Engelhardt. 2012. Application of deglycosylation to SDS PAGE analysis improves calibration of influenza antigen standards. *Biologicals.* 40:96–99.



**Biophysical Journal, Volume 117**

**Supplemental Information**

**Detecting and Controlling Dye Effects in Single-Virus Fusion  
Experiments**

**Robert J. Rawle, Ana M. Villamil Giraldo, Steven G. Boxer, and Peter M. Kasson**

## Supporting Information for Detecting and controlling dye effects in single-virus fusion experiments

Robert J. Rawle, Ana M. Villamil Giraldo, Steven G. Boxer, Peter M. Kasson

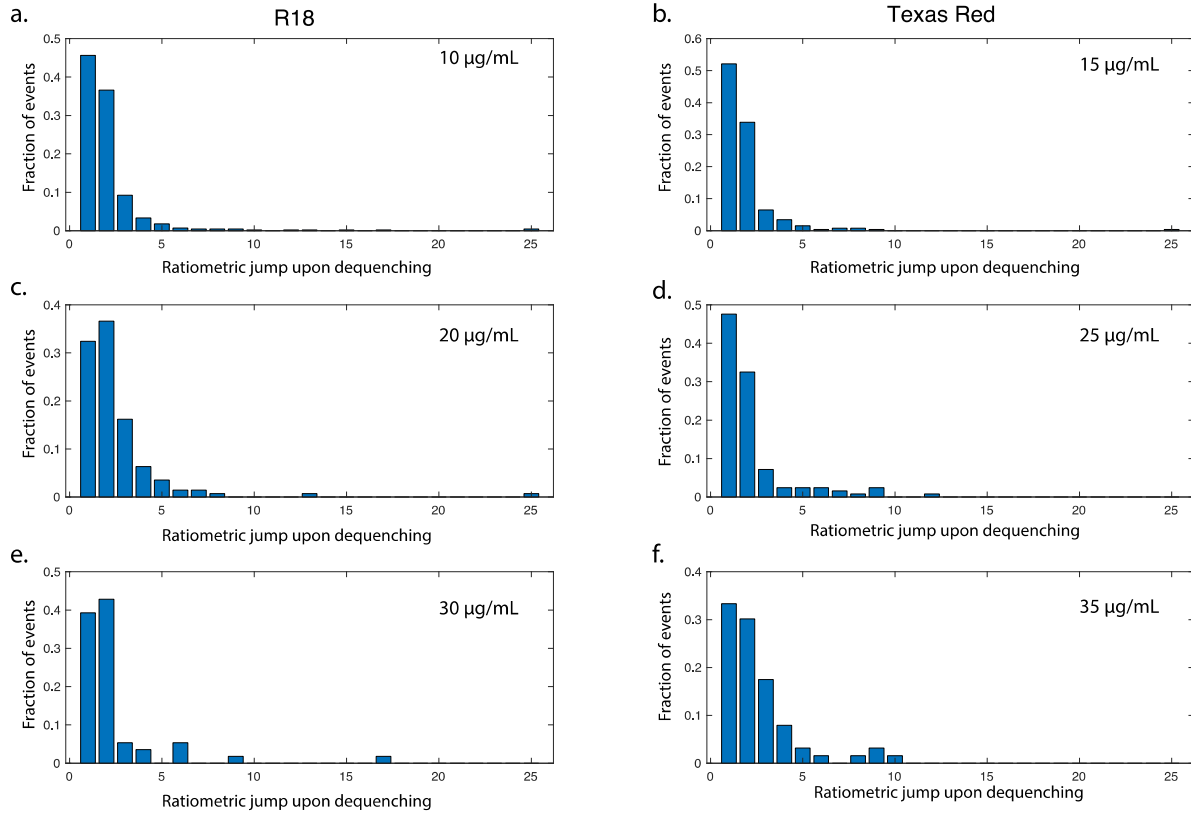

**Figure S1. Ratiometric intensity increase upon lipid mixing for different labeling conditions.** Intensity traces of single influenza virus spots were analyzed for fusion, and the intensity ratio after versus before each identified dequenching event was calculated. Histograms of these ratios, thus representing the distribution of dequenching jumps across the population of fusing labeled virions, are plotted for viruses labeled with R18 at 10  $\mu\text{g/mL}$  (a), 20  $\mu\text{g/mL}$  (c), and 30  $\mu\text{g/mL}$  (e) and for Texas Red at 15  $\mu\text{g/mL}$  (b), 25  $\mu\text{g/mL}$  (d), and 35  $\mu\text{g/mL}$  (e).

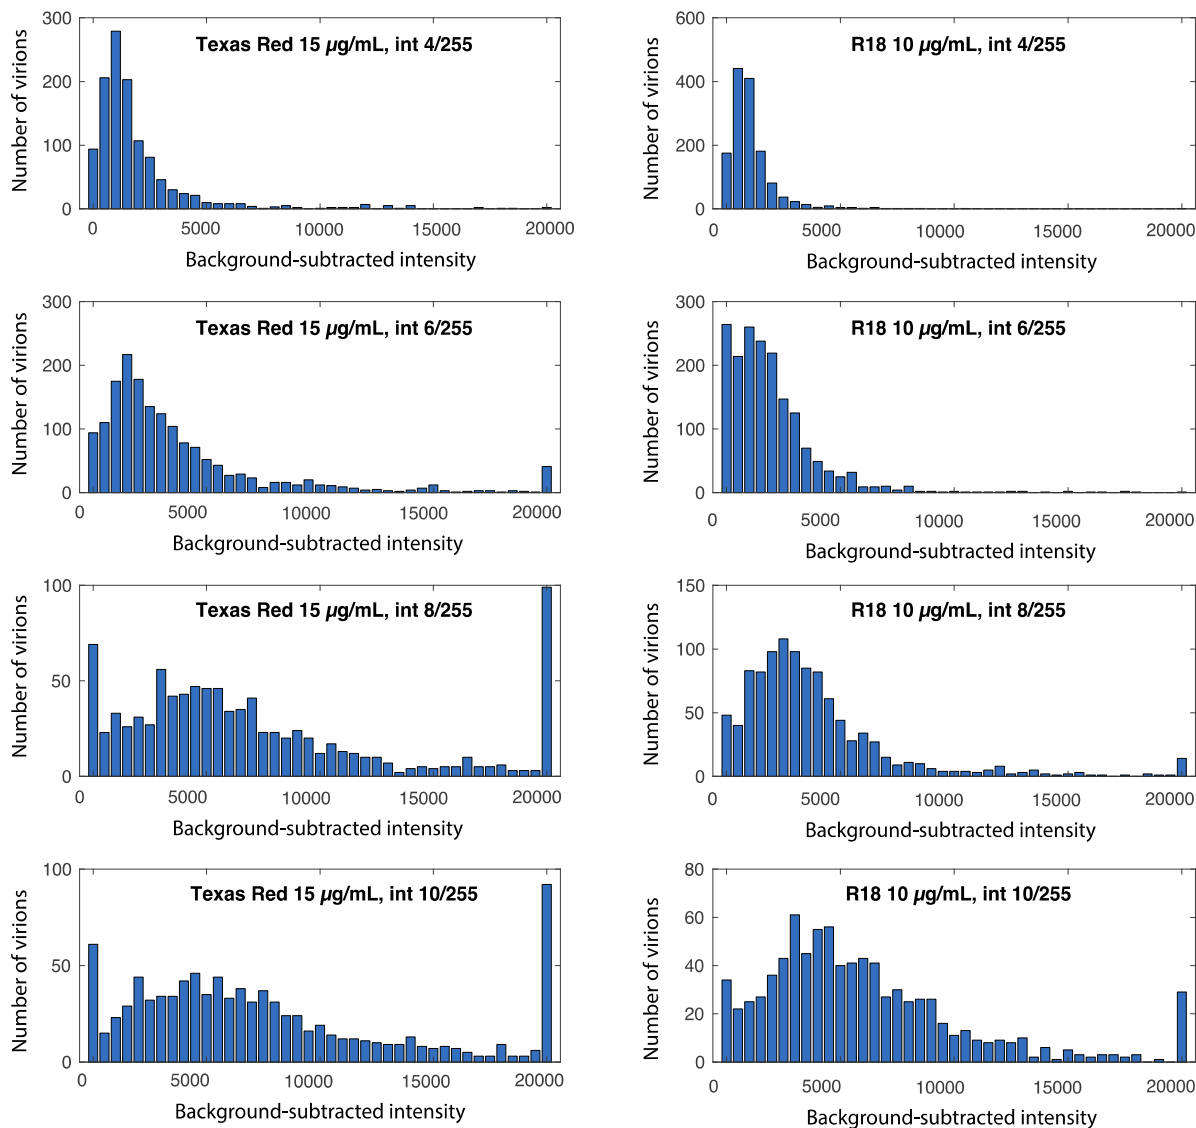

**Figure S2.** Starting intensity distributions of Texas-Red-labeled and R18-labeled viral particles at different illumination levels. As expected, intensities increase slightly with illumination, although the intensity distribution for R18 is perturbed less than the corresponding one for Texas Red. Intensity values are taken 4s after pH drop. Absolute numbers of particles undergoing lipid mixing out of those identified are as follows:

R18 10 µg/mL:

illumination 4/255: 571 dequenched of 1396 identified

illumination 6/255: 869 dequenched of 1743 identified

illumination 8/255: 349 dequenched of 1036 identified

illumination 10/255: 278 dequenched of 847 identified

Texas Red 15 µg/mL:

illumination 4/255: 382 dequenched of 1171 identified

illumination 6/255: 539 dequenched of 1668 identified

illumination 8/255: 302 dequenched of 949 identified

illumination 10/255: 289 dequenched of 936 identified.

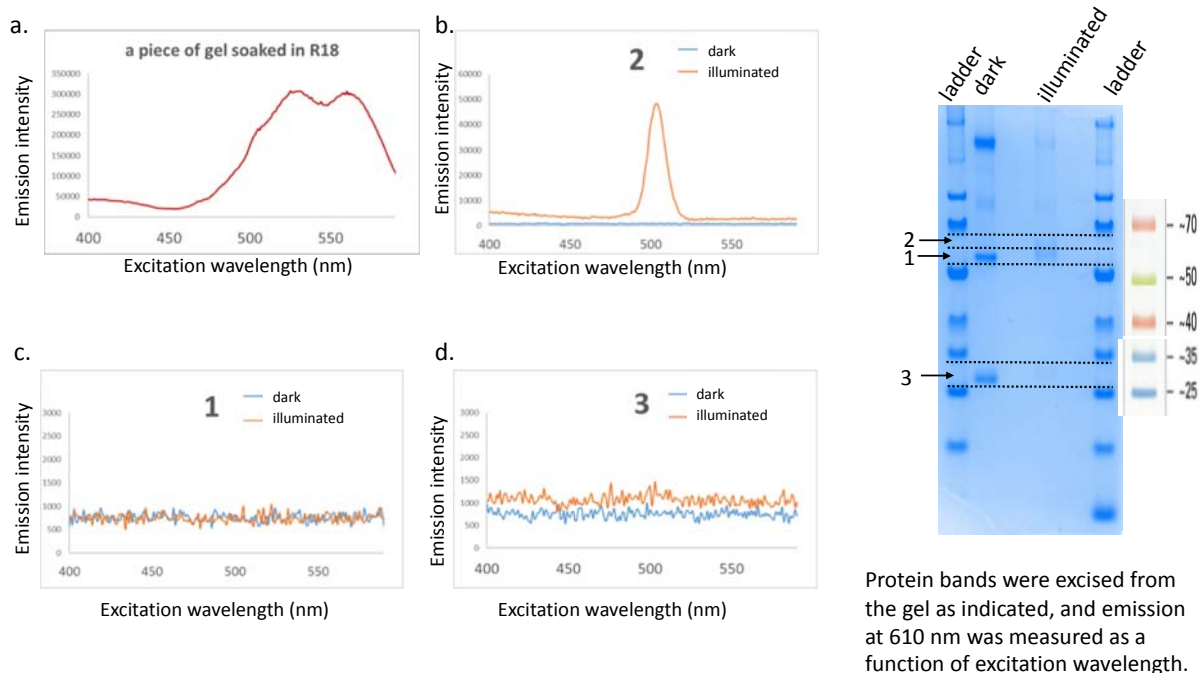

**Figure S3. Fluorescence spectra of R18 and photolabeled viral protein.** Influenza virus was labeled with R18, illuminated, detergent-solubilized, and the proteins separated via SDS-PAGE. The indicated bands in the illuminated sample were excised, and fluorescence excitation spectra were measured as indicated (emission at 610 nm as a function of excitation wavelength). Bands are compared to gel soaked in R18 dye (a). The illuminated band at 55 kDa showed a gel-shift, and the shifted portion of this band (b), but not the unperturbed portions (c, d) showed fluorescence with an excitation wavelength slightly blue-shifted from unmodified R18. Each lane on the gel contained viral sample containing 10  $\mu\text{g}$  of viral protein prior to labeling. We do not have sufficient information to assign the nature of the chemical change, but the excitation shift demonstrates a fluorescent product that is chemically modified from the R18 reactant.

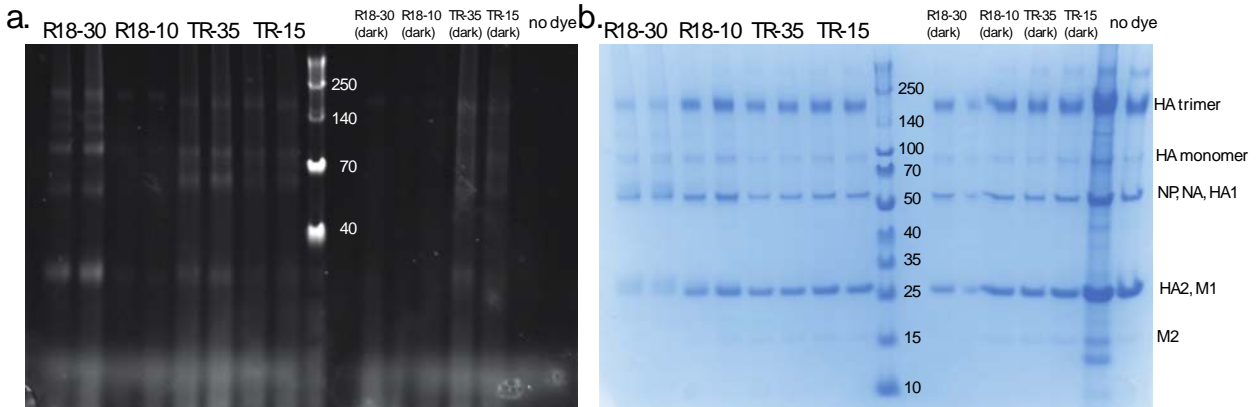

**Figure S4. Photolabeling and gel shift of R18-labeled influenza virus.** Shown are fluorescence imaging and Coomassie staining of viral protein under different labeling and illumination conditions. Virus was labeled with the designated dye: R18 or Texas Red (TR) and amount in  $\mu\text{g}/\text{mL}$ , either illuminated or kept in the dark, and then detergent-solubilized and separated via SDS-PAGE. Shown are fluorescence imaging of the gel (a) using bandpass filters for excitation 520–545 nm and emission 577–613 nm and subsequent Coomassie staining (b). These gels were quantitated in Figure 4. Each lane on the gel contained viral sample containing 10  $\mu\text{g}$  of viral protein prior to labeling. Bands are labeled with major viral proteins that migrate at those molecular weights. In influenza viral extract, several viral proteins can co-migrate, and these are indicated by comma-separated lists.
